# Supplementary material
Source: Springer Nature journal article supplement (https://www.springermedizin.de/resource/supplementary/13018_2008_117_MOESM1_ESM.pdf/9636352)

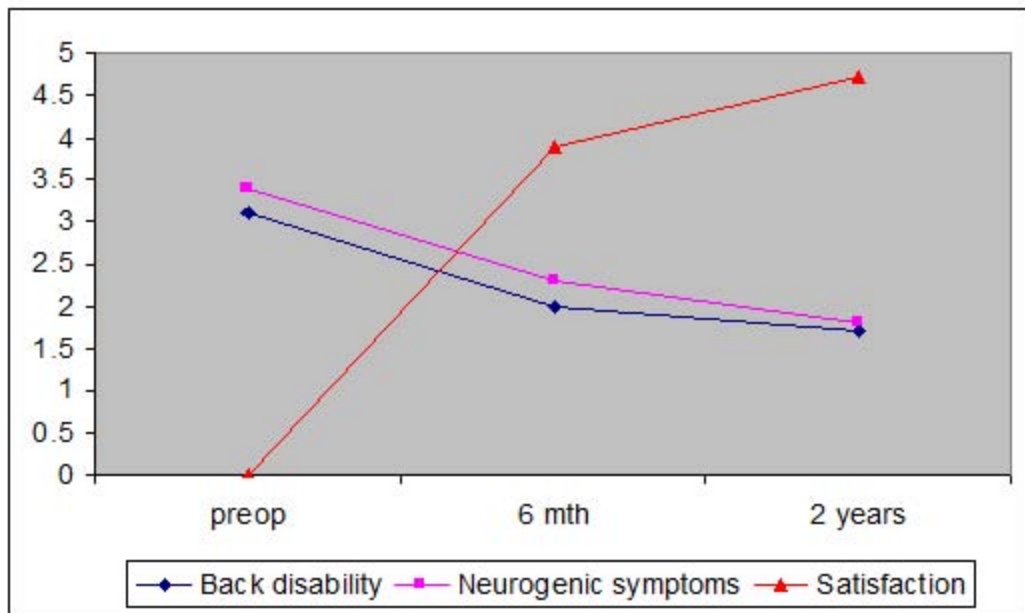

|         | Back disability | Neurogenic symptoms | Satisfaction |
|---------|-----------------|---------------------|--------------|
| preop   | 3.1             | 3.4                 | 0            |
| 6 mth   | 2 p=0.02        | 2.3 p=0.04          | 3.9          |
| 2 years | 1.7 p=0.03      | 1.8 p=0.02          | 4.7          |

Supplement: MOESM1 [file 9636352]
